# Supplementary material
Source: PubMed Central journal article supplement (PMC3824176)
Supplement: jcbfm2013126x1.pdf [file jcbfm2013126x1.pdf]

## SUPPLEMENTARY INFORMATION

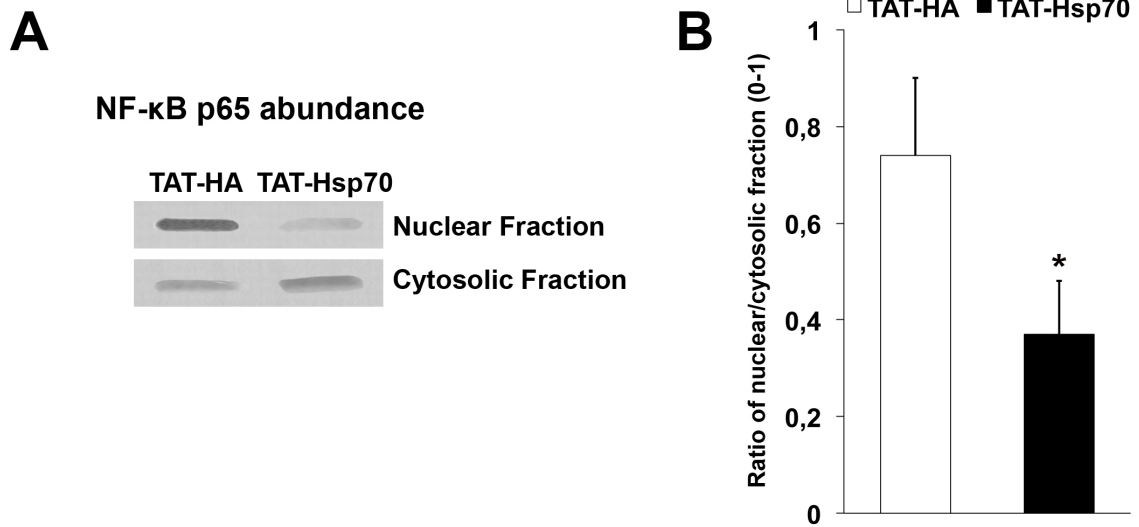

**Suppl. Fig. 1. Analysis of NF- $\kappa$ B translocation after cerebral ischemia in mice.** (A) Animals were exposed to cerebral ischemia and treated with either TAT-HA (control) or TAT-Hsp70 at 12 h after induction of stroke. Thereafter, mice (n=4 per condition) were sacrificed on day 3 and left (ischemic) brain homogenates were fractionated into cytosolic and nuclear fractions. Detection of NF- $\kappa$ B p65 was performed both in nuclear fractions (indicating activation of NF- $\kappa$ B) and cytosolic fractions using Western blotting. (B) Densitometric analysis from Western blots obtained in (A) with calculation of the nuclear/cytosolic ratio. \*Significantly different from TAT-HA-treated animals,  $p < 0.05$ .
